# Supplementary material
Source: MDPI journal article supplement (https://www.mdpi.com/2073-4344/10/4/405)
Supplement: s1 [file s1]

## Supporting Information

# Structurally and Compositionally Tunable Absorption Properties of AgCl@AgAu Nanocatalysts for Plasmonic Photocatalytic Degradation of Environmental Pollutants

Han-Jung Ryu<sup>1, †</sup>, Ha-Lin Kim<sup>1, †</sup>, Jang Ho Joo<sup>1</sup>, and Jae-Seung Lee<sup>1, \*</sup>

<sup>1</sup>Department of Materials Science and Engineering, Korea University, 145 Anam-ro, Seongbuk-gu, Seoul 02841, Republic of Korea

E-mail: JSLEE79@korea.ac.kr

† H.-J.R. and H.-L.K. contributed equally to this work.

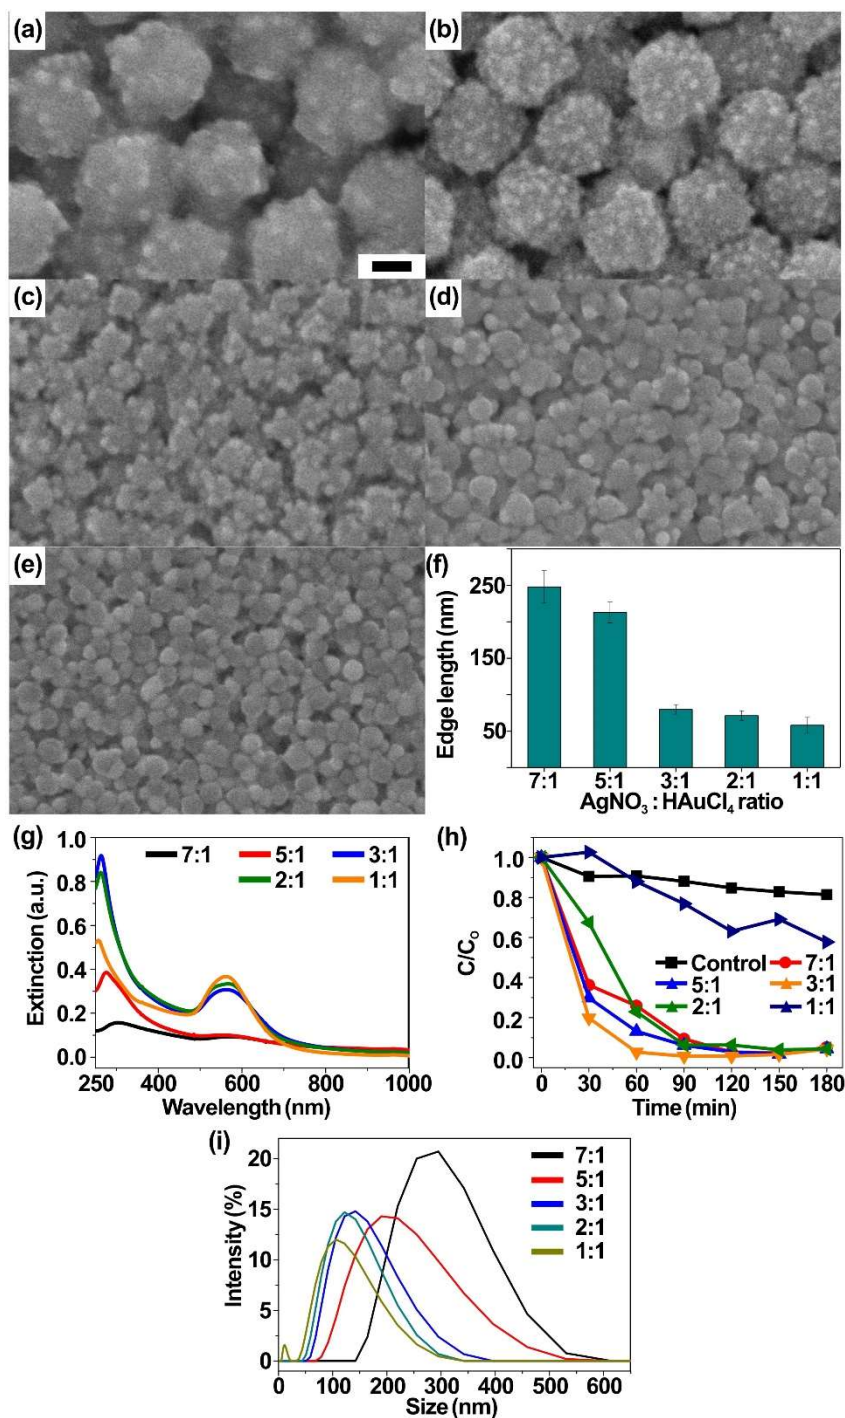

**Figure S1.** The AgCl@AgAu NPs with different diameters were synthesized with different mole ratios of AgNO<sub>3</sub> and HAuCl<sub>4</sub>. (a-e) SEM images of the AgCl@AgAu NPs synthesized with different mole ratios of AgNO<sub>3</sub> and HAuCl<sub>4</sub> at (a) 7:1, (b) 5:1, (c) 3:1, (d) 2:1, and (e) 1:1. The scale bar is 100 nm. (f) The diameters of the AgCl@AgAu NPs are shown as a function of the mole ratio of AgNO<sub>3</sub> and HAuCl<sub>4</sub>. (g) UV-vis spectra and (h) time-dependent photocatalytic degradation of amaranth under visible light irradiation with the AgCl@AgAu NPs with different sizes (Figures S1a-S1e). (i) Size distributions of the AgCl@AgAu NPs with different sizes were obtained using dynamic light scattering (DLS).

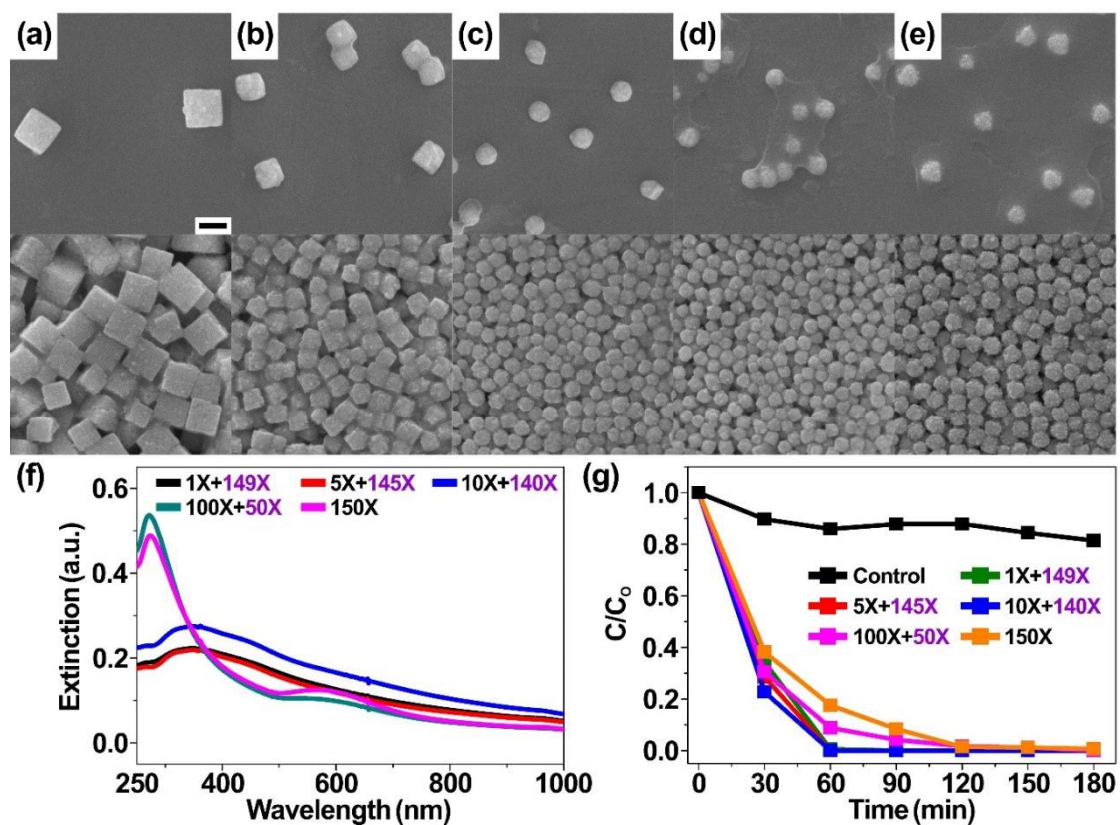

**Figure S2.** The AgCl@AgAu NPs synthesized with 55k PVP with different shapes. (a-e) SEM images of the AgCl NPs synthesized with 55k PVP having different initial concentrations (upper row), and the corresponding AgCl@AgAu NPs after the formation of metallic bumps using concentrated PVP (lower row). The concentrations of the initial 55k PVP were (a) 1X (0.0357 g/L), (b) 5X (0.178 g/L), (c) 10X (0.357 g/L) (d) 100X (3.571 g/L), and (e) 150X (5.356 g/L), respectively, and the final concentration of 55k PVP was 150X (5.356 g/L) in common. The scale bar is 250 nm. (f) UV-vis spectra of the AgCl@AgAu NPs synthesized with 55k PVP with different shapes. (g) Time-dependent photocatalytic degradation of amaranth with the AgCl@AgAu NPs synthesized with 55k PVP with different shapes.

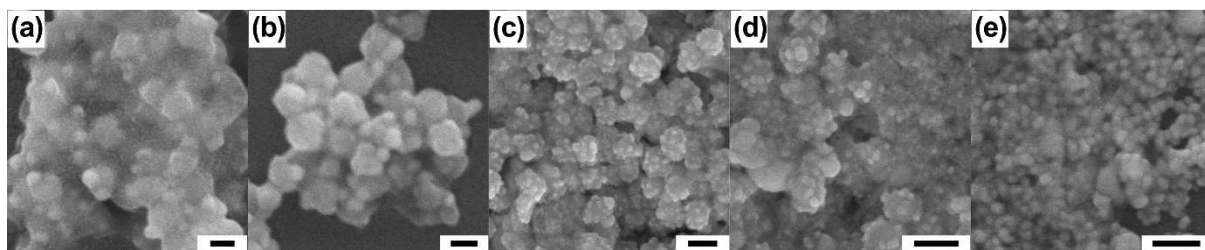

**Figure S3.** The stability of the AgCl@AgAu NPs with different shapes (shown in Figure S2) which were synthesized with different initial concentrations of 55k PVP. (a-e) SEM images of the AgCl@AgAu NPs after the photocatalytic degradation of amaranth for 24 h. All scale bars are 150 nm.
